# Supplementary material for: Cerebrovascular Disease Hospitalization Rates in End-Stage Kidney Disease Patients with Kidney Transplant and Peripheral Vascular Disease: Analysis Using the National Inpatient Sample (2005–2019)
Source: MDPI journal article supplement (doi:10.3390/healthcare12040454), 2024-02-10
Supplement: s1 [file s1]

Supplemental Table S1: Key Study Variables

| Category                  | Variable                                                                    | Variable Description                                                                                                                                                                   |
|---------------------------|-----------------------------------------------------------------------------|----------------------------------------------------------------------------------------------------------------------------------------------------------------------------------------|
| Dependent Variables       | Cerebral infarction due to thrombosis, embolism, occlusion, and stenosis    | Binary, indicating if encounter is identified with corresponding ICD-10/9 codes.                                                                                                       |
|                           | Artery occlusion and stenosis resulting in cerebral Ischemia                |                                                                                                                                                                                        |
|                           | Intraoperative and Postprocedural Infarction                                |                                                                                                                                                                                        |
|                           | Non-traumatic Intracranial hemorrhage                                       |                                                                                                                                                                                        |
| Key Diagnoses of Interest | End-Stage Renal Disease<br>Kidney Transplant<br>Peripheral Vascular Disease | Binary, indicating if encounter is identified with corresponding ICD-10/9 codes                                                                                                        |
| Comorbidity Index         | Elixhauser                                                                  | Standard comorbidity index which utilizes ICD diagnosis codes to sort patient morbidities (Elixhauser et al., 1998).                                                                   |
| Sociodemographic Factors  | Age                                                                         | Age in years at admission                                                                                                                                                              |
|                           | Race                                                                        | Race/Ethnicity of patient                                                                                                                                                              |
|                           | Primary Expected Payer                                                      | Medicare, Medicaid, Private insurance, Self-pay, No charge, Other                                                                                                                      |
|                           | Patient's ZIP Code                                                          | Quartile categorization based on annually collected demographic data.                                                                                                                  |
|                           | Patient Location: NCHS Urban-Rural Code                                     | Six-category urban-rural classification for U.S. counties developed by the National Center for Health Statistics (Data Access - Urban Rural Classification Scheme for Counties, 2022). |

Supplemental Table S1. Key Study Variables.

**Supplemental Table S2: ICD-10 and ICD-9 Descriptions**

| <b>Diagnosis</b>                                                                | <b>ICD-10</b>                                                                                                                                                                                                                                                                                                                         | <b>ICD-9</b>                                 |
|---------------------------------------------------------------------------------|---------------------------------------------------------------------------------------------------------------------------------------------------------------------------------------------------------------------------------------------------------------------------------------------------------------------------------------|----------------------------------------------|
| <b>End-Stage Renal Disease</b>                                                  | N18.6                                                                                                                                                                                                                                                                                                                                 | 585.6                                        |
| <b>Kidney Transplant</b>                                                        | Z94.0, Z48.22                                                                                                                                                                                                                                                                                                                         | 556.9, V42.0                                 |
| <b>Peripheral Vascular Diseases</b>                                             | I73.8 I73.89 I73.9                                                                                                                                                                                                                                                                                                                    | 443.89                                       |
| <b>Nontraumatic intracranial hemorrhage</b>                                     | I60.0 I60.00 I60.01 I60.02<br>I60.1 I60.10 I60.11 I60.12 I60.2 I60.3 I60.30 I60.31<br>I60.32 I60.4 I60.5 I60.50 I60.51 I60.52 I60.6 I60.7<br>I60.8 I60.9 I61.0 I61.1 I61.2 I61.3 I61.4 I61.5 I61.6<br>I61.8 I61.9 I62.0 I62.00 I62.01 I62.02 I62.03 I62.1<br>I62.9                                                                    | 430 431 432.1 432.0<br>432.9                 |
| <b>Cerebral infarction due to thrombosis, embolism, occlusion, and stenosis</b> | I63.0 I63.00 I63.01 I63.011<br>I63.012 I63.013 I63.019 I63.02 I63.03 I63.031<br>I63.032 I63.033 I63.039 I63.09 I63.1 I63.10 I63.11<br>I63.111 I63.112 I63.113 I63.119 I63.12 I63.13<br>I63.131 I63.132 I63.133 I63.139 I63.19 I63.2 I63.20<br>I63.21 I63.211 I63.212 I63.213 I63.219 I63.23<br>I63.231 I63.232 I63.233 I63.239 I63.29 | 433.91 433.21<br>433.01 433.11 433.81 433.91 |
| <b>Artery occlusion and stenosis resulting in cerebral ischemia</b>             | I65.0 I65.01 I65.02 I65.03 I65.09 I65.1 I65.2<br>I65.21 I65.22 I65.23 I65.29 I65.8 I65.9                                                                                                                                                                                                                                              | 433.20 433.00<br>433.10 433.80 433.90        |

**Supplemental Table S2. Describes ICD-9 and ICD-10 codes which correspond to each condition used in the analysis.**
